# Supplementary material for: Detrimental role of IL-33/ST2 pathway sustaining a chronic eosinophil-dependent Th2 inflammatory response, tissue damage and parasite burden during Toxocara canis infection in mice
Source: PubMed Central journal article supplement (PMC8354467; doi:10.1371/journal.pntd.0009639), 2021-07-29
Supplement: pntd.0009639.s003.pdf [file pntd.0009639.s003.pdf]

**S3 Table 1. Main findings in the liver, lung and brain in histopathological analysis in *T. canis* infection.**

| <b>Group</b>                   | <b>Liver</b>                                                                                                                                                                    | <b>Lung</b>                                                                                                                                                                                                                          | <b>Brain</b>                                                                                                                                                                                                                                                                                                   |
|--------------------------------|---------------------------------------------------------------------------------------------------------------------------------------------------------------------------------|--------------------------------------------------------------------------------------------------------------------------------------------------------------------------------------------------------------------------------------|----------------------------------------------------------------------------------------------------------------------------------------------------------------------------------------------------------------------------------------------------------------------------------------------------------------|
| <b>WT 3dpi</b>                 | Larvae dispersed in the parenchyma; necrotic areas; hemorrhage; vascular congestion; inflammatory foci mixed composed of eosinophils, neutrophils, macrophages and lymphocytes. | Interalveolar septal thickening with mixed inflammatory infiltrate; perivascular edema; hemorrhagic areas; larvae in the lung parenchyma; bronchial and bronchiolar cell hypertrophy; presence of granulomas in the exudative phase. | Multifocal areas of hemorrhage; vacuolation of the neuropil in the cerebral cortex; hemorrhagic foci in the cerebellum and hippocampus; Inflammatory infiltrates in the cerebral cortex.                                                                                                                       |
| <b>ST2<sup>-/-</sup> 3dpi</b>  | Larvae dispersed in the parenchyma; necrotic areas; hemorrhage; vascular congestion; inflammatory foci mixed composed of neutrophils, macrophages and lymphocytes.              | Interalveolar septal thickening with mixed inflammatory infiltrate; perivascular edema; hemorrhagic areas; larvae in the lung parenchyma; bronchial and bronchiolar cell hypertrophy.                                                | Multifocal areas of hemorrhage; vacuolation of the neuropil in the cerebral cortex; hemorrhagic foci in the cerebellum and hippocampus; inflammatory infiltrates in the cerebral cortex.                                                                                                                       |
| <b>WT 14dpi</b>                | Inflammatory foci in the parenchyma; presence of granulomas in the exudative phase.                                                                                             | Macrophages with brownish pigment in the cytosol; presence of granuloma in the exudative phase.                                                                                                                                      | Hemorrhagic foci in the cerebrum.                                                                                                                                                                                                                                                                              |
| <b>ST2<sup>-/-</sup> 14dpi</b> | Inflammatory foci in the parenchyma with few eosinophils and lymphocytes; presence of few granulomas in the exudative phase.                                                    | Macrophages with brownish pigment in the cytosol; diffuse inflammatory infiltrate with little presence of neutrophils and eosinophils.                                                                                               | Hemorrhagic foci in the cerebrum.                                                                                                                                                                                                                                                                              |
| <b>WT 63dpi</b>                | Inflammatory foci in the hepatic and perivascular parenchyma; vascular congestion; presence of granulomas in the exudative and productive phase.                                | Thickening of the interalveolar septa; diffuse inflammatory infiltrate with formation of BALT; small hemorrhagic foci; capillary congestion; presence of granulomas in the production phase.                                         | Focal areas with “gitter cells” in the white matter of the cerebellar folia; vacuolization areas and gliosis foci; reactive blood vessels in the cerebellum and cerebrum; presence of larvae and hemorrhagic foci in the cerebrum and hippocampus; perivascular accumulation of hemosiderophages in the brain. |
| <b>ST2<sup>-/-</sup> 63dpi</b> | Inflammatory foci in the hepatic and perivascular parenchyma with few eosinophils; vascular congestion; presence of few granulomas in the exudative and productive phase.       | Thickening of the interalveolar septa; diffuse inflammatory infiltrate with formation of BALT; small hemorrhagic foci; capillary congestion; presence of few granulomas.                                                             | Focal areas with “gitter cells” in the white matter of the cerebellar folia; vacuolization areas and gliosis foci; reactive blood vessels in the cerebellum and cerebrum; few hemorrhagic foci; perivascular accumulation of hemosiderophages in the brain.                                                    |
